# Supplementary material
Source: PubMed Central journal article supplement (PMC6646148)
Supplement: ao7b01347_si_001.pdf [file ao7b01347_si_001.pdf]

# Supporting information for

## Drug carrying Capacity and Anticancer effect of Folic acid and Berberine loaded Silver Nanomaterial to Regulate AKT-ERK pathway in Breast Cancer”

Ramasamy Bhanumathi<sup>1</sup>, Manickam Manivannan<sup>1</sup>, Ramasundaram Thangaraj<sup>1</sup> and Soundarapandian Kannan<sup>1\*</sup>

1. Division of Cancer Nanomedicine, Department of Zoology, Periyar University, Salem-636 011, Tamil Nadu, INDIA \*

Correspondence

**E-mail:** [skperiyaruniv@gmail.com](mailto:skperiyaruniv@gmail.com)

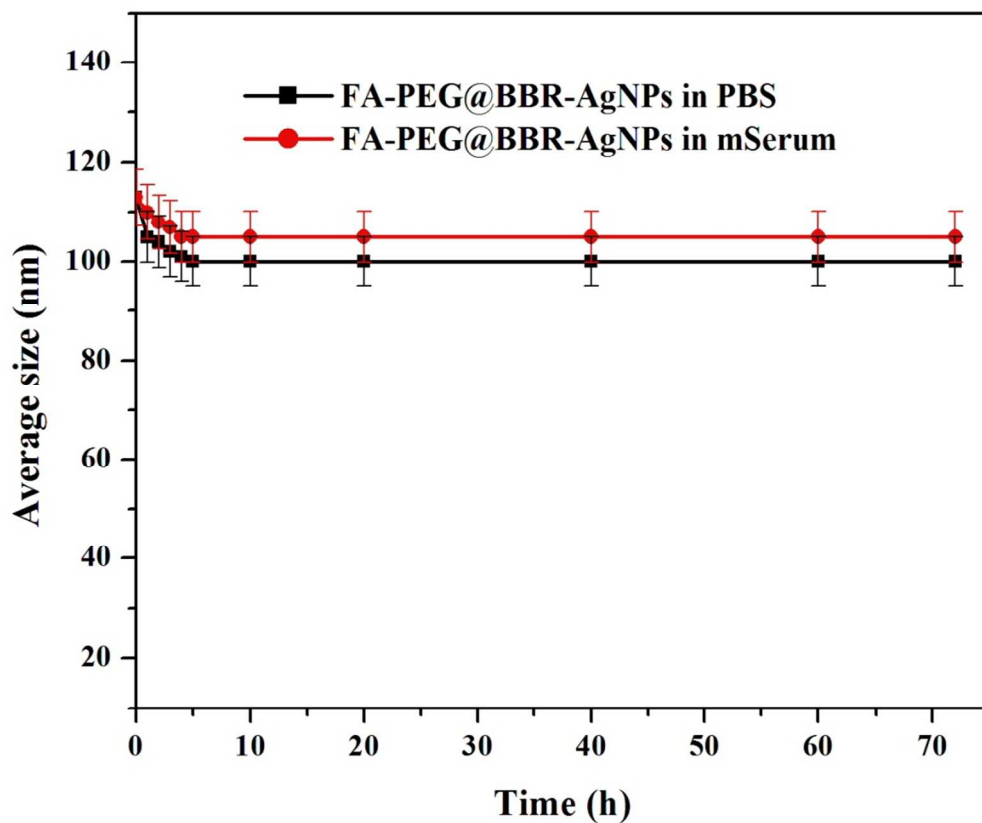

**Figure S1.** The stability of formulated FA-PEG@BBR-AgNPs nanomaterial in 10% mouse serum (mSerum) and 0.01M concentration of PBS (pH 7.4) was determined by DLS at 37° C for 72 h.
